# Supplementary material
Source: Springer Nature journal article supplement (https://www.springermedizin.de/resource/supplementary/12913_2011_2204_MOESM2_ESM.pdf/9529664)

Health coach

Patient

**KEY FUNCTIONS**

Assesment

Recommendation

Follow-up

Monitoring and evaluation

Starting the care process again

**1 Know how and when to call help**

**2 Learn about the condition and set goals**

**3 Take medicines correctly**

**4 Get recommended tests and services**

**5 Act to keep the condition well controlled**

**6 Make lifestyle changes and reduce risks**

**7 Build on strengths and overcome obstacles**

**8 Follow-up specialists and appointments**

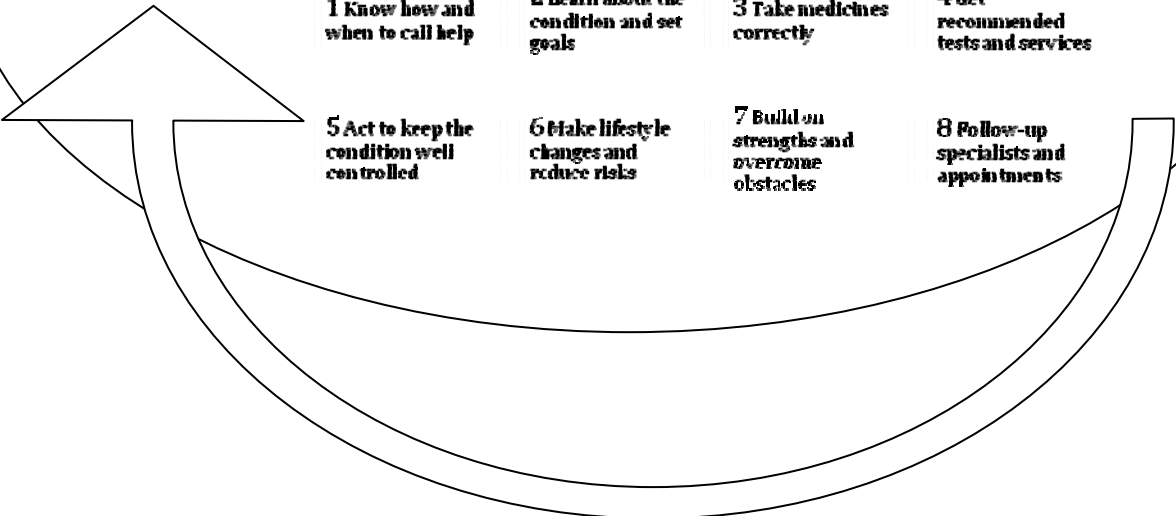

Supplement: MOESM2 [file 9529664]
